# Supplementary material for: Comparative Analysis of Biological Properties of Large-Scale Expanded Adult Neural Crest-Derived Stem Cells Isolated from Human Hair Follicle and Skin Dermis
Source: Hindawi journal article supplement (doi:10.1155/2019/9640790), 2019-02-19
Supplement: f1 [file 9640790.f1.pdf]

## Supplementary materials

**Supplementary Table 1. Antibodies used in a study**

| Antigen     | Fluorochrome | Host   | Clone       | Manufacturer        |
|-------------|--------------|--------|-------------|---------------------|
| CD105       | PerCP-Cy5.5  | mouse  | 266         | BD Pharmingen™      |
| CD117       | APC          | mouse  | YB5.B8      | BD Pharmingen™      |
| CD140a      | PerCP-Cy5.5  | mouse  | αR1         | BD Pharmingen™      |
| CD140b      | PE           | mouse  | 28D4        | BD Pharmingen™      |
| CD146       | PE-CF594     | mouse  | P1H12       | BD Horizon™         |
| CD166       | BV421        | mouse  | 3A6         | BD Horizon™         |
| CD34        | APC          | mouse  | 581         | BD Pharmingen™      |
| CD349       | Unconjugated | rabbit | Polyclonal  | Bioss               |
| CD45        | FITC         | mouse  | HI30        | BD Pharmingen™      |
| CD56        | PE           | mouse  | B159        | BD Pharmingen™      |
| CD73        | APC          | mouse  | AD2         | BD Pharmingen™      |
| CD90        | FITC         | mouse  | 5E10        | BD Pharmingen™      |
| HLA-DR      | PE-Cy5       | mouse  | G46-6       | BD Pharmingen™      |
| Nestin      | Unconjugated | rabbit | Polyclonal  | Sigma-Aldrich       |
| Nestin      | PE           | mouse  | 25/NESTIN   | BD Pharmingen™      |
| NeuN        | Unconjugated | mouse  | 377         | Chemicon, Millipore |
| NF (NF-H)   | Unconjugated | mouse  | RT97        | DSHB                |
| NSE         | Unconjugated | rabbit | Polyclonal  | Bioss               |
| p75 (CD271) | Unconjugated | rabbit | Polyclonal  | BioLegend           |
| p75 (CD271) | PE           | mouse  | C40-1457    | BD Pharmingen™      |
| S100β       | Unconjugated | rabbit | Polyclonal  | Abcam               |
| Sox10       | Unconjugated | mouse  | 20B7        | R&D Systems         |
| Sox10       | Unconjugated | mouse  | SOX10/991 + | Novus Biologicals   |

|                     |              |        |            |               |
|---------------------|--------------|--------|------------|---------------|
|                     |              |        | SOX10/1074 |               |
| Sox2                | Unconjugated | rabbit | Polyclonal | BioLegend     |
| $\beta$ III-tubulin | Unconjugated | mouse  | SDL.3D10   | Sigma-Aldrich |

Table S1 – List of antibodies used in this study for identification of human cultured hair follicle- and skin dermis-derived adult NCSCs and their differentiated derivative cell types.

**Supplementary Table 2. The primers sequence used in a study**

| <i>Gene</i>             | <b>Forward primer<br/>5'→3'</b> | <b>Reverse primer<br/>5'→3'</b> |
|-------------------------|---------------------------------|---------------------------------|
| <i>TBP</i>              | ccactcacagactctcacaac           | ctgcggtacaatcccagaact           |
| <i>POU5F1(OCT3/4)</i>   | tgactcctcgggcccttc              | tccaggtttctttccctagc            |
| <i>TERT</i>             | ctccatcctgaaagccaagaa           | agtcagcttgagcaggaatg            |
| <i>LIN28</i>            | agcctcatgtccgctgaagg            | gcagggtagggctgtggatt            |
| <i>KLF4</i>             | tcccgccgctccattacaa             | gggggtgaagaaggtgggggtga         |
| <i>NANOG</i>            | tcccctctcccacccctca             | ggctccaaccatactccaccct          |
| <i>MYC</i>              | agaacggagggaggatcgc             | ctcgtccctctgcctctcg             |
| <i>SOX2</i>             | cagctcgcagacctacatga            | tggagtgggaggaagaggta            |
| <i>SOX9</i>             | gaaagagaggaccaaccagaat          | ttgggtacgagttgccttag            |
| <i>SOX10</i>            | ttgactactctgacatcagccc          | agtgtcgtatatactggctgctcc        |
| <i>TFAP2A</i>           | cgaaacccaatttctgccaagc          | agatgaggttgaagtgggtcaagc        |
| <i>NGFR (CD271/p75)</i> | acctccagaacaagacctatagc         | ttgttctgcttcagctgttcc           |
| <i>NESTIN</i>           | agaggaagagaacctgggaaag          | ttggctcttccaccgtatc             |
| <i>SNAIL1</i>           | ccacgaggtgtgactaactatg          | accaaacaggaggctgaata            |
| <i>SNAIL2</i>           | cctgtgctgaccaaccaata            | atgctcttcagctctctct             |
| <i>TWIST1</i>           | cgggagtcgcagctctta              | gcttgagggtctgaatcttg            |
| <i>FGF2</i>             | caccagtggatagtgtgagaga          | gccaatcttggttcaggtactta         |
| <i>VEGFA</i>            | ccatcgacagaacagtcttaatc         | tggcgaatccaattccaagag           |
| <i>NGF</i>              | taccaagggagcagcttcta            | cattgctctctgagtggttc            |
| <i>BDNF</i>             | gtcaagttgggagcctgaaatag         | aggtgtgaaatgggctgaatg           |
| <i>GDNF</i>             | acttgggtctgggctatgaaac          | ctttgtcactcaccagccttct          |
| <i>NTF3</i>             | ggcgcaactactttctctctct          | agctcggtcattcaaagtctcc          |
| <i>NTF4/5</i>           | tcctatgtgcgggcattga             | tctcagcatccagctctgttatt         |

|            |                        |                      |
|------------|------------------------|----------------------|
| <i>LIF</i> | gaagggtcggatctgagagaat | ctggaccctgacaccctaaa |
|------------|------------------------|----------------------|

Table S2 – PCR primer sequences used in this study for identification of human cultured hair follicle- and skin dermis-derived adult NCSCs and their differentiated derivative cell types.
